# Supplementary material for: Global transcriptional control by glucose and carbon regulator CcpA in Clostridium difficile
Source: PubMed Central journal article supplement (PMC3510511; doi:10.1093/nar/gks864), 2012-09-18
Supplement: supp_gks864_nar-01170-x-2012-File010.pdf [file supp_gks864_nar-01170-x-2012-File010.pdf]

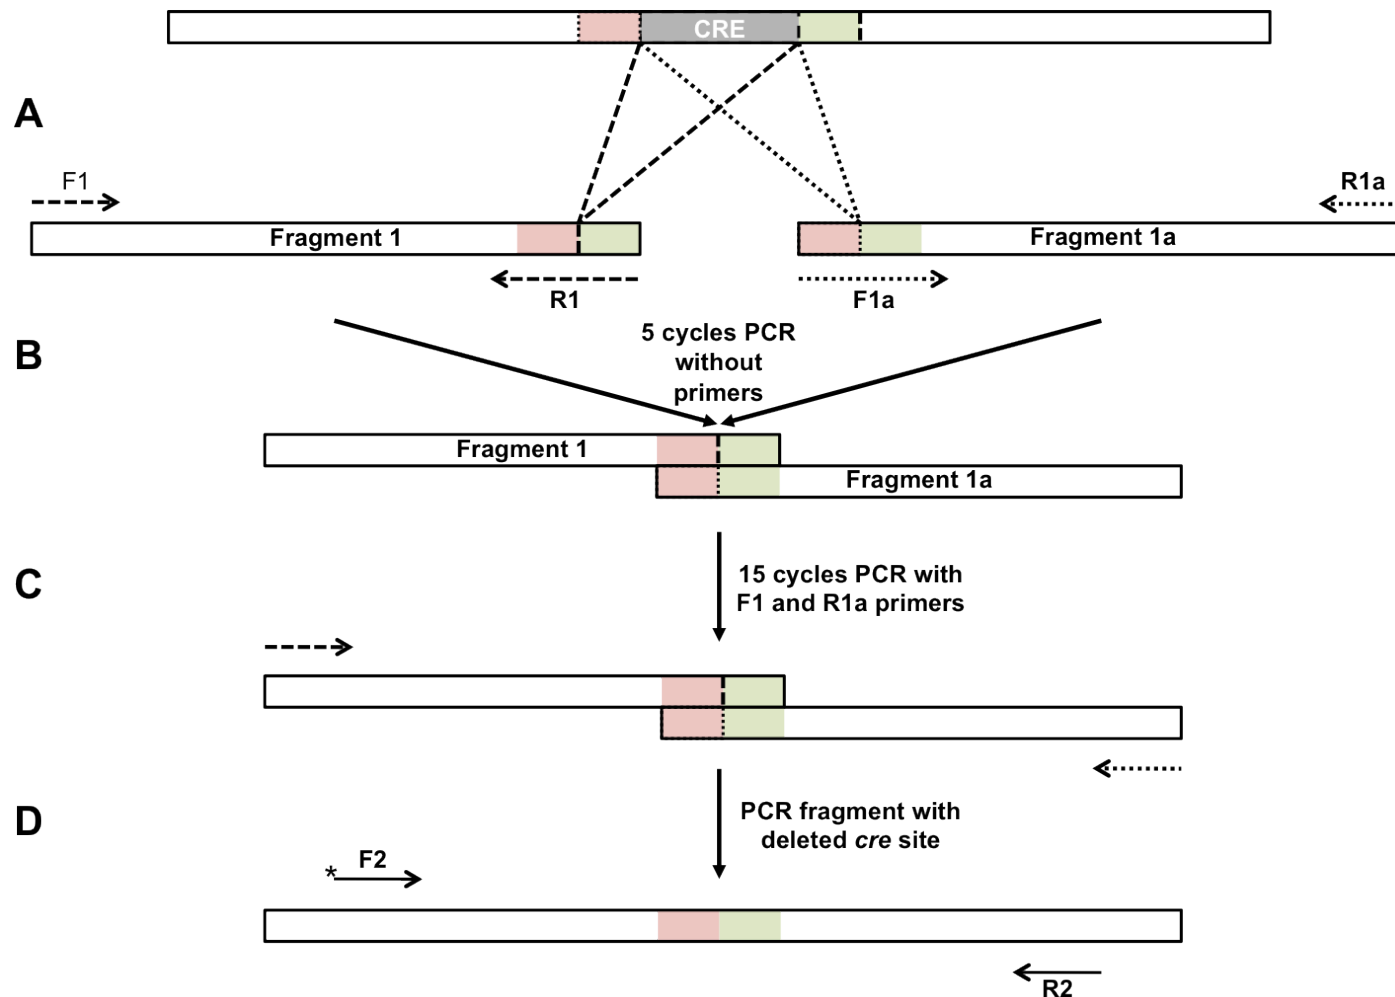

**Figure S1.** Methodology of the *cre<sub>CD</sub>* motif deletion by self-priming PCR.

(A) Amplification of the fragments 1 and 1a using mutated primers R1 and F1a permitting the deletion of *cre<sub>CD</sub>* site. (B) PCR of 5 cycles without primers in order to hybridize the fragments 1 and 1a in the overlap regions. (C) PCR of 15 cycles with external primers F1 and R1a permitting the amplification of the deleted *cre<sub>CD</sub>* site DNA fragment. (D). PCR of 15 cycles with  $\gamma^{32}\text{P}$ -ATP radiolabelled F2 primer and R2 primer from deleted *cre<sub>CD</sub>* site fragment.

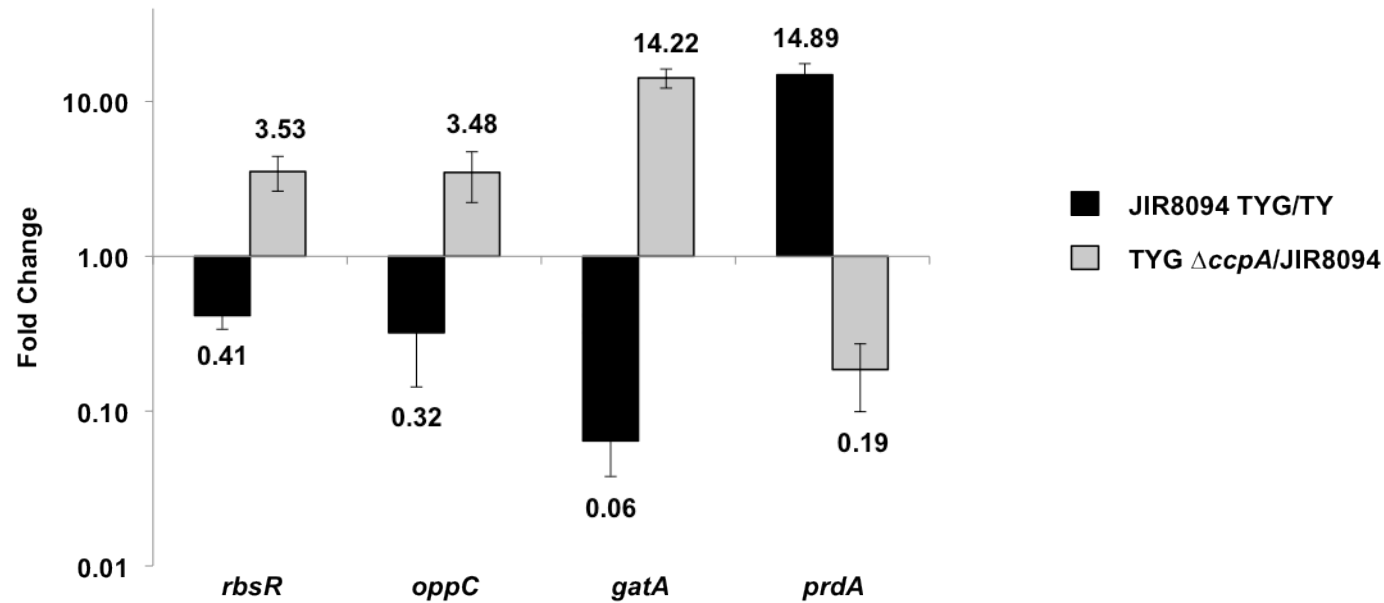

**Figure S2.** Effect of glucose and CcpA on the transcription of *rbsR*, *oppC*, *gatA* and *prdA* during exponential growth phase.

Relative expression of *rbsR*, *oppC*, *gatA* and *prdA* determined by qRT-PCR analysis. RNAs were extracted from 3 independent cultures of JIR8094 or *ccpA* mutant strains harvested during exponential growth phase at an OD<sub>600</sub> of 0.6. The fold change was calculated using the  $2^{(-\Delta\Delta Ct)}$  method. Gene expression was normalized using the housekeeping *dnaF* gene (CD1305). Error bars indicate standard deviation. Student's *t*-test was used to determine the significant differences (p.value < 0.05).
